# Supplementary material
Source: Springer Nature journal article supplement (https://www.springermedizin.de/resource/supplementary/12883_2009_274_MOESM1_ESM.pdf/9457218)
Supplement: MOESM1 [file 9457218]

ER & Overnight admissions

Does patient meet inclusion criteria?

no

CT

yes

Stroke MRI

T2\*, DWI, TOF-MRA, FLAIR, PI

Admission to Stroke Unit or Neurologic Ward

Treatment according to guidelines – iv. Alteplase

Day 2 Stroke MRI

Day 5-7 Stroke MRI  
(protocol without PI)

Hospital discharge

Day 90 Follow Up via Telephone + mRS

**Inclusion criteria**

MRI eligibility (i.e. no pacemaker)

>18 years

<24 h since onset

informed consent (not necessary for day 1)
